# Supplementary material for: Surprising results on phylogenetic tree building methods based on molecular sequences
Source: Springer Nature journal article supplement (doi:10.1186/1471-2105-13-148), 2012-06-27
Supplement: 12859_2011_5374_MOESM2_ESM.pdf [file 12859_2011_5374_MOESM2_ESM.pdf]

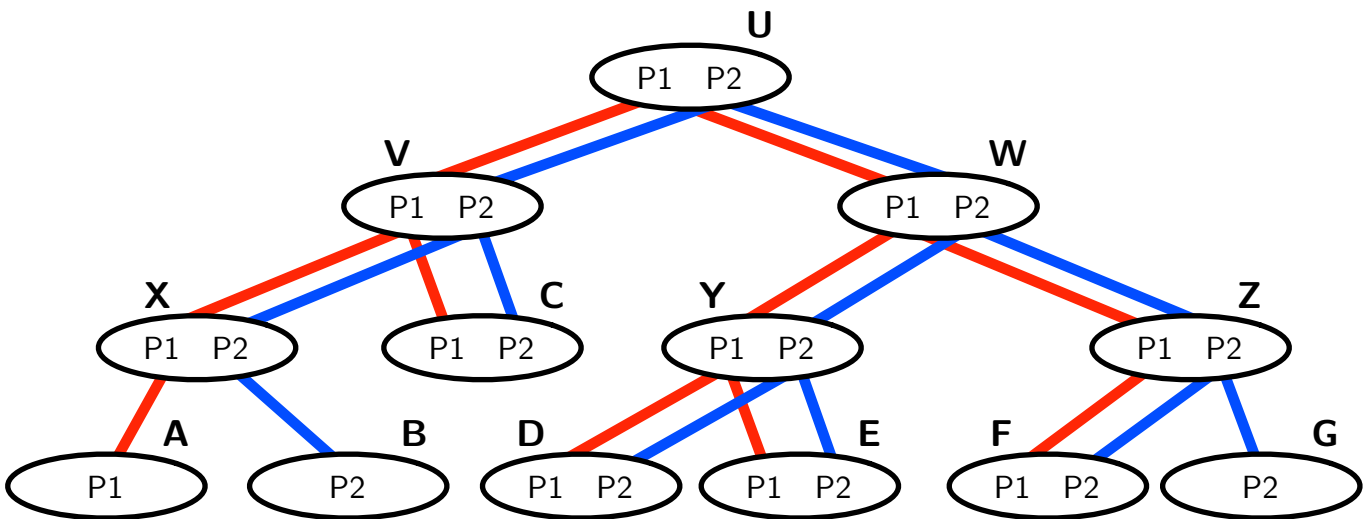

TreeBuilder

P1 Group

P2 Group

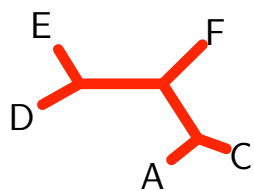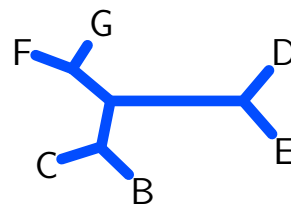

Reduce to common leaves

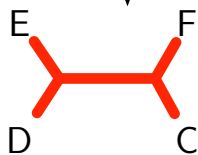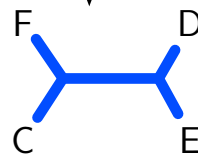

Robinson-Foulds distance = 0
