# Supplementary material for: Surprising results on phylogenetic tree building methods based on molecular sequences
Source: Springer Nature journal article supplement (doi:10.1186/1471-2105-13-148), 2012-06-27

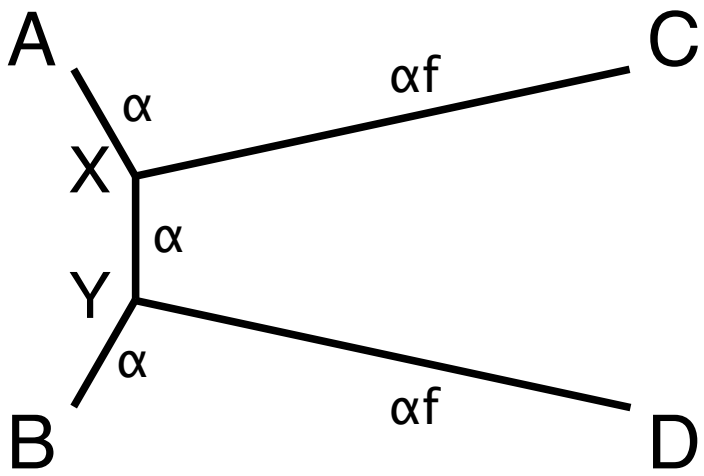

Supplement: 12859_2011_5374_MOESM4_ESM.pdf [file 12859_2011_5374_MOESM4_ESM.pdf]
